# Supplementary material for: Adaptive traits of cysts of the snow alga Sanguina nivaloides unveiled by 3D subcellular imaging
Source: PubMed Central journal article supplement (PMC10657455; doi:10.1038/s41467-023-43030-7), 2023-11-18
Supplement: 41467_2023_43030_MOESM4_ESM.pdf [file 41467_2023_43030_MOESM4_ESM.pdf]

## **Description of Additional Supplementary Files:**

**Supplementary Movie 1:** Microscopic water streams at the surface of ice grains

**Supplementary Movie 2:** Red snow X-ray tomography

**Supplementary Movie 3:** FIB-SEM stack of chemically-fixed *Sanguina nivaloides* cysts

**Supplementary Movie 4:** Overview of chemically fixed red snow sample

**Supplementary Movie 5:** FIB-SEM stack of cryo-fixed *Sanguina nivaloides* cysts

**Supplementary Movie 6:** Overview of cryo-fixed red snow sample

**Supplementary Movie 7:** *Sanguina* and bacteria 3D segmentation

**Supplementary Movie 8:** Cryo-fixed *Sanguina nivaloides* cell 2 used for volumetric study

**Supplementary Movie 9:** *Sanguina nivaloides* lipid droplet nano-structure

**Supplementary Movie 10:** Whole cell architecture of *Sanguina nivaloides* cyst highlighting mitochondria proximity to chloroplastic starch
